# Supplementary material for: The Class IIA Histone Deacetylase (HDAC) Inhibitor TMP269 Downregulates Ribosomal Proteins and Has Anti-Proliferative and Pro-Apoptotic Effects on AML Cells
Source: MDPI journal article supplement (doi:10.3390/cancers15041039), 2023-02-07
Supplement: s1 [file s1]

# The Class IIA histone deacetylase (HDAC) inhibitor TMP269 downregulates ribosomal proteins and has anti-proliferative and pro-apoptotic effects on AML cells

Laura Urwanisch<sup>1,2,†</sup>, Michael Stefan Unger<sup>1,2,†</sup>, Helene Sieberer<sup>1,2</sup>, Hieu-Hoa Dang<sup>1,2</sup>, Theresa Neuper<sup>1,2</sup>, Christof Regl<sup>1,2</sup>, Julia Vetter<sup>3</sup>, Susanne Schaller<sup>3</sup>, Stephan M Winkler<sup>3</sup>, Emanuela Kerschbamer<sup>4</sup>, Christian X Weichenberger<sup>4</sup>, Peter W Krenn<sup>1,2</sup>, Michela Luciano<sup>1,2</sup>, Lisa Pleyer<sup>2,5,6</sup>, Richard Greil<sup>2,5,6</sup>, Christian G. Huber<sup>1,2</sup>, Fritz Aberger<sup>1,2</sup>, Jutta Horejs-Hoeck<sup>1,2,\*</sup>

## 1. Supplementary Materials and Methods for Proteomics

### 1.1. Chemicals

Ultrapure water for solutions was produced in-house with a MilliQ® Integral 3 instrument (Millipore, Billerica, MA, USA). Acetonitrile (ACN, ≥ 99.9%) and methanol were acquired from VWR International (Vienna, Austria). Triethylammonium bicarbonate buffer (TEAB, pH 8.5 ± 0.1, 1 mol.L<sup>-1</sup>), sodium dodecyl sulfate (SDS, ≥ 99.5%), tris(2-carboxyethyl)phosphine-hydrochloride (TCEP, ≥ 98.0%), iodoacetamide (IAA, ≥ 99.0%), formic acid (FA, 98.0–100%) and cOmplete Protease Inhibitor Cocktail tablets (Roche) were obtained from Sigma-Aldrich (Vienna, Austria). Ortho-phosphoric acid (85%) was from Merck (Darmstadt, Germany). Trypsin (sequencing grade modified, porcine) was purchased from Promega (Madison, WI, USA).

### 1.2. Sample preparation

Samples were prepared by suspension trapping utilizing S-Trap micro columns from Protifi (NY, USA) with minor adaptations to the manufacturer's instructions. Cells were lysed in 5% SDS in 50 mmol.L<sup>-1</sup> TEAB (pH 8.50) at 95°C for 5 min followed by sonication in a Bioruptor device (Diagenode, Liège, Belgium) for 10 min. After a 10 sec centrifugation step at 13,000 g, protein content in the supernatant was analyzed by a Pierce BCA Protein assay kit (Thermo Fisher Scientific, Vienna, Austria) according to the manufacturer's instructions. An amount of 50 µg protein per sample was further treated with 5 mmol.L<sup>-1</sup> TCEP at 55°C for 15 min to reduce disulfide bonds, followed by alkylation of cysteine residues by addition of IAA to a concentration 40 mmol.L<sup>-1</sup> and incubation at 22°C in the dark for 15 min. Subsequently the samples were acidified to pH ≤ 1 with ortho-phosphoric acid before purification by the S-Trap micro columns. For proteolysis, trypsin was added to give an enzyme to protein ratio of 1:10 (w/w) followed by overnight incubation at 37°C. The obtained peptides were eluted from the S-trap columns, dried at 45°C in a vacuum centrifuge, and resuspended in 100 mmol.L<sup>-1</sup> TEAB (pH 8.5).

### 1.3. High-performance liquid chromatography coupled to mass spectrometry

Chromatographic separation of 1 µg of each sample was carried out on an UltiMate™ 3000 RSLCnano System (Thermo Fisher Scientific, Germering, Germany), employing a µPAC™ C18 separation column (2000 × 0.040 mm i.d.) from PharmaFluidics, Ghent, Belgium. For separation of the peptides, 0.10% aqueous FA (solvent A) and 0.10% FA in ACN (solvent B) were pumped at a flow rate of 300 nL.min<sup>-1</sup> in the following order: 1.0% B for 10.0 min, a linear gradient from 1.0–25.0% B in 170 min and a second linear gradient from 25.0–45.0% B in 20.0 min. This was followed by flushing with 80.0% B for 10 min and column re-equilibration with 1.0% B for 60 min. The column temperature was kept constant at 50°C.

The nanoHPLC system was hyphenated to a Q Exactive™ Plus Hybrid Quadrupole-Orbitrap™ mass spectrometer via a Nanospray Flex™ ion source (both from Thermo

Fisher Scientific, Bremen, Germany). The source was equipped with a SilicaTip emitter with 360  $\mu\text{m}$  o.d., 20  $\mu\text{m}$  i.d. and a tip i.d. of 10  $\mu\text{m}$  purchased from CoAnn Technologies Inc. (Richland, WA, USA). The spray voltage was set to 1.5 kV, S-lens RF level to 55.0 and capillary temperature to 320 °C. Each scan cycle consisted of a full scan at a scan range of  $m/z$  350–2,000 and a resolution setting of 70,000 at  $m/z$  200, followed by 15 data-dependent higher-energy collisional dissociation (HCD) scans in a 2.0  $m/z$  isolation window at 32% normalized collision energy at a resolution setting of 17,500 at  $m/z$  200. For the full scan the automatic gain control (AGC) target was set to 3e6 charges with a maximum injection time of 100 ms; for the HCD scans the AGC target was 1e5 charges with a maximum injection time of 100 ms. Already fragmented precursor ions were excluded for 30 seconds. Data acquisition was conducted using Thermo Scientific™ Chromeleon™ 7.2 CDS (Thermo Fisher Scientific, Germering, Germany).

#### 1.4. Data evaluation

The peptide spectra were analyzed by utilizing MaxQuant 2.0.1.0 [33] and the default settings for label-free quantification (LFQ). For protein identification, a database from the Uniprot consortium [34] including only reviewed Swiss-Prot entries for *Homo sapiens* (Human) from 03.02.2022 was used, applying a 1% false discovery rate and a reversed sequence decoy database. The obtained protein groups were further processed using the Perseus software platform [35]. The identified protein groups were filtered to remove decoy hits as well as proteins that were only identified by site. Next, the LFQ intensities were log2-transformed and normalized by subtraction of the median.

## 2. Supplementary Figures

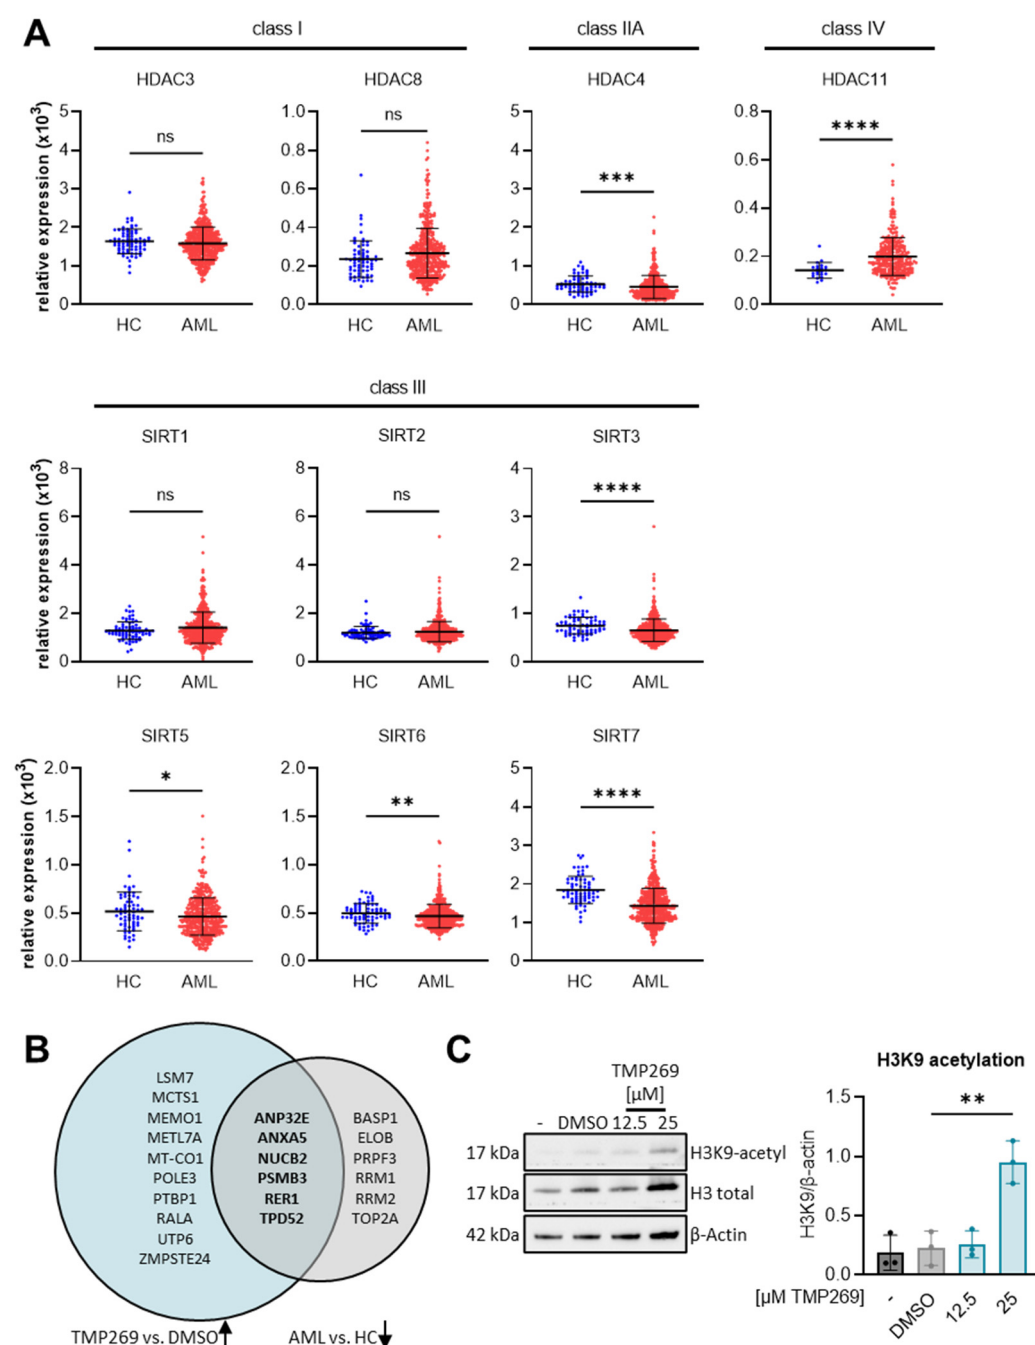

**Supplementary Figure S1: HDAC gene expression in AML patients, comparative bioinformatic analysis with the MILE study (Gene Expression Omnibus - GEO: GSE13159) and H3K9 acetylation analysis.** (A) Significantly reduced *HDAC4*, *SIRT3*, *SIRT5*, *SIRT6* and *SIRT7* gene expression in AML patients compared to healthy controls (HC). *HDAC11* was significantly overexpressed in AML patients. The dataset was imported using GEOparse from Python. Data are mean ± SD and were statistically analyzed by two-tailed Mann-Whitney U test, \**p* ≤ 0.05, \*\**p* ≤ 0.01, \*\*\**p* ≤ 0.001, \*\*\*\**p* ≤ 0.0001. (B) Venn diagram showing the intersection of 6 proteins upregulated by TMP269 treatment in MOLM-13 cells (TMP269 vs. DMSO) which are downregulated at the gene expression level in AML patients (AML vs. HC). (C) Western blot analysis for H3K9 acetylation, H3 total and β-actin in MOLM-13 cells treated with 12.5 and 25 μM TMP269 for 24 hours. H3K9 acetylation was significantly increased in cells treated with 25 μM TMP269. Representative blot out of 3 replicates (n=3). Data are mean ± SD and were statistically analyzed by one-way analysis of variance (ANOVA) with Tukey's post-hoc test, \*\**p* ≤ 0.01. ns = not significant. - = uninduced, untreated cells. DMSO = solvent control, 0.1% DMSO as final concentration.

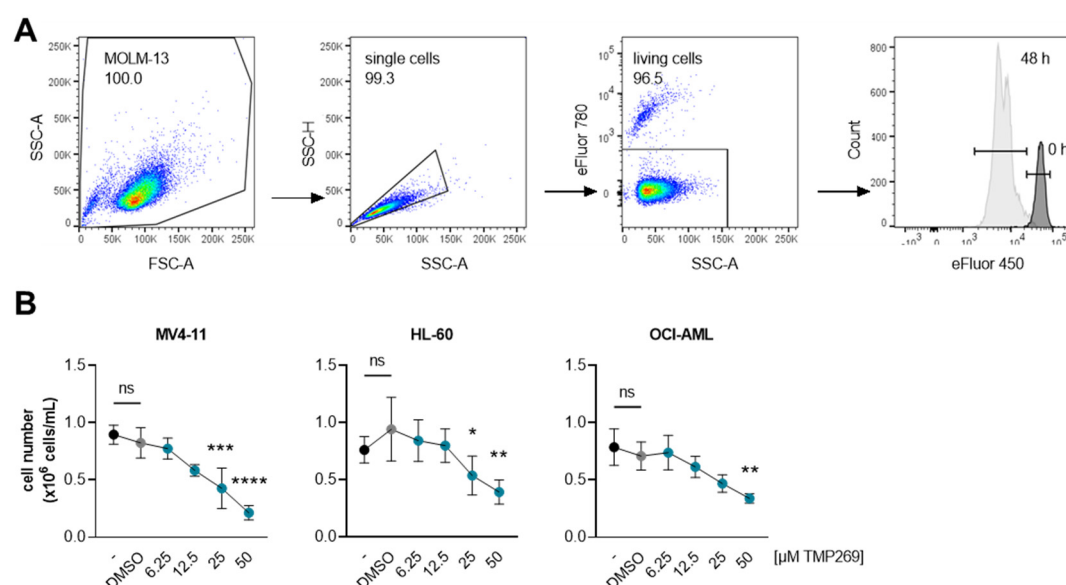

**Supplementary Figure S2: Representative FACS plots for the gating strategy in the proliferation assay and treatment of different AML cell lines with increasing concentrations of TMP269. (A)** After 48 hours of incubation with the cell proliferation dye, live single MOLM-13 cells were gated for eFluor 450 fluorescence signal. To mark non-proliferating cells, MOLM-13 cells were immediately stained (0 hours) and analyzed for eFluor 450 fluorescence signal (non-proliferation control). Proliferating cells can be distinguished from non-proliferating cells upon reduction of eFluor 450 fluorescence signal. **(B)** Cell numbers were assessed upon treatment with the indicated concentrations of TMP269 after 48 hours in different AML cell lines (MV4-11, HL-60, OCI-AML) by manual cell counting using a Neubauer chamber (n=4). TMP269 treatment significantly reduced cell numbers in a concentration-dependent manner in all tested AML cell lines. Data are mean  $\pm$  SD and were statistically analyzed by one-way analysis of variance (ANOVA) with Tukey's post-hoc test, \* $p \leq 0.05$ , \*\* $p \leq 0.01$ , \*\*\* $p \leq 0.001$ , \*\*\*\*  $p \leq 0.0001$ . Stars indicate statistical significance compared to the DMSO-treated group. ns = not significant. - = uninduced, untreated cells. DMSO = solvent control, 0.1% DMSO as final concentration.

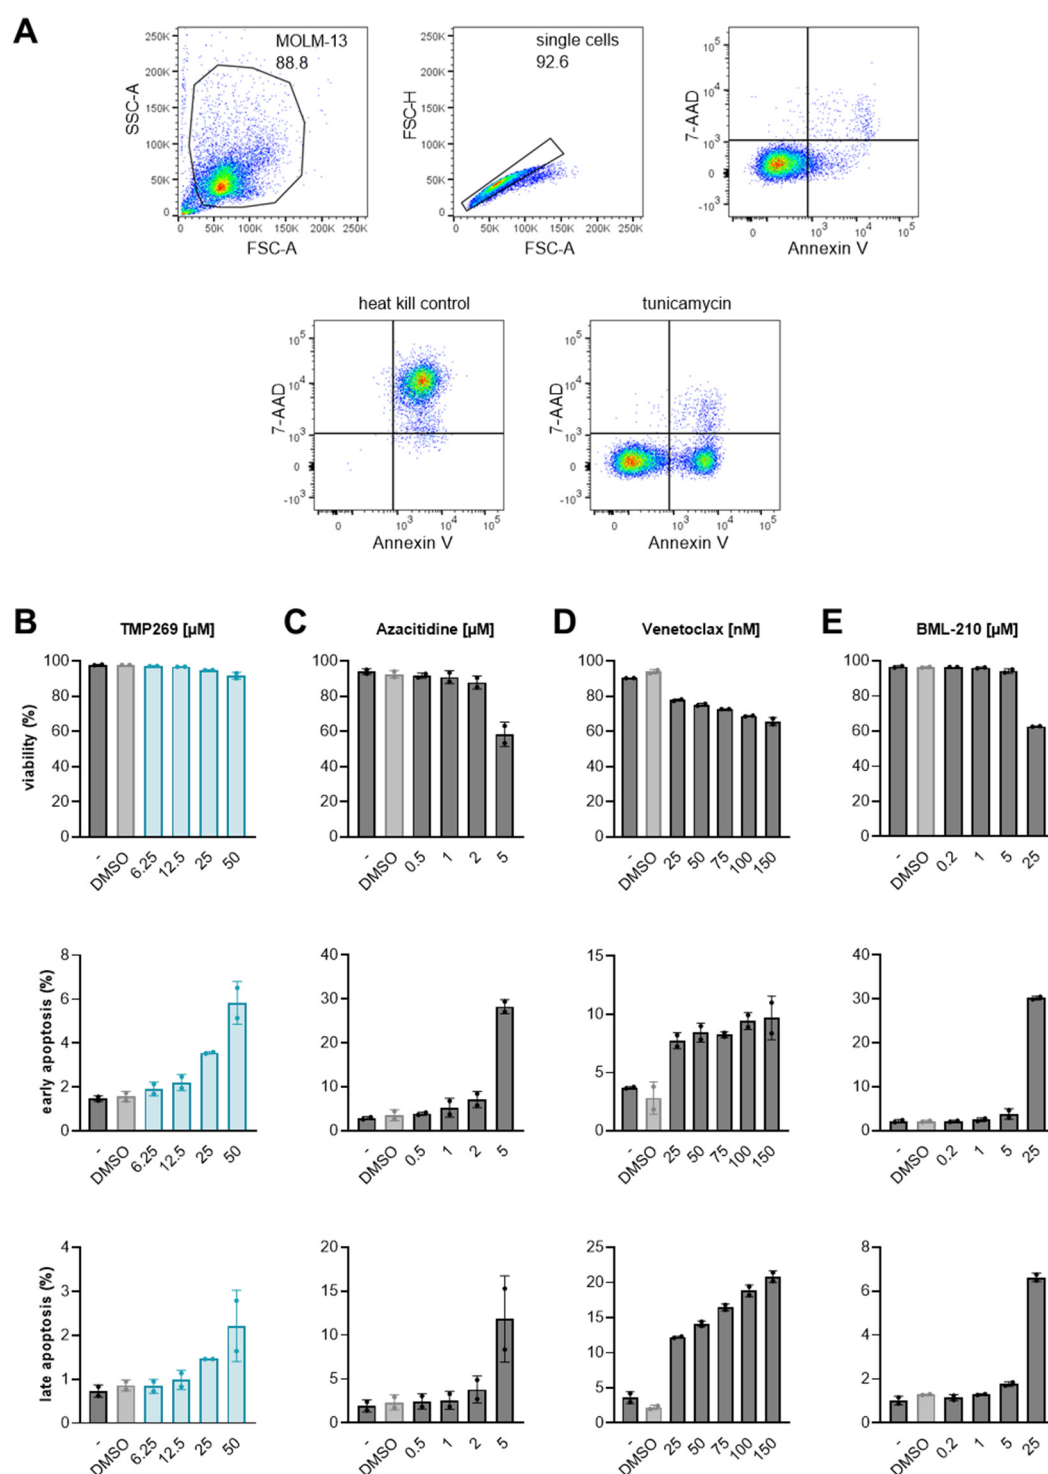

**Supplementary Figure S3: Gating strategy for the apoptosis assay, and treatment of MOLM-13 cells with increasing concentrations of TMP269, azacitidine, venetoclax and BML-210 for cell death analysis.** (A) Representative FACS plots showing gating strategy for Annexin V and 7-AAD staining in the apoptosis assay. Single MOLM-13 cells were gated for percentages of viable (Annexin V and 7-AAD negative), early apoptotic (Annexin V positive and 7-AAD negative), or late apoptotic MOLM-13 cells (Annexin V and 7-AAD positive). For positive control of early apoptosis, cells were treated with 10  $\mu\text{g/mL}$  tunicamycin; for late apoptosis, the cells were heat-killed. MOLM-13 cells were treated with 6.25–50  $\mu\text{M}$  TMP269 (B), 0.5–5  $\mu\text{M}$  azacitidine (C), 25–150 nM venetoclax (D), or 0.2–25  $\mu\text{M}$  BML-210 (E) for 24 hours. Data are mean  $\pm$  SD ( $n=2$ ). - = uninduced, untreated cells. DMSO = solvent control, 0.1% DMSO as final concentration.

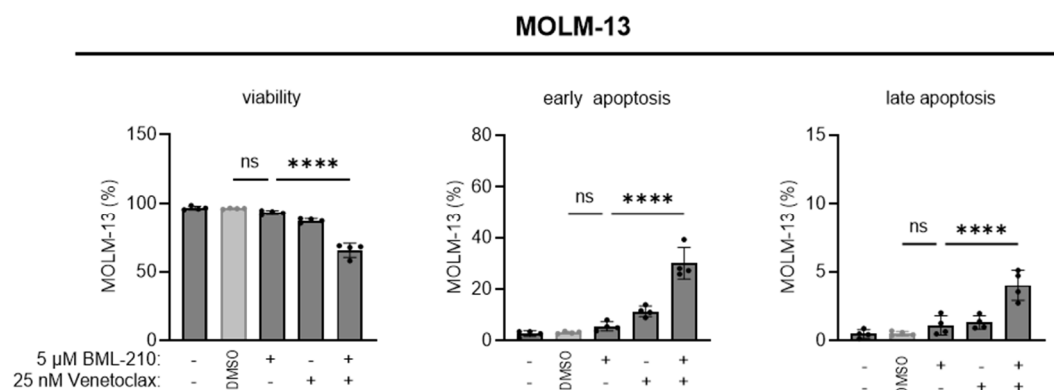

**Supplementary Figure S4: The combination treatment of BML-210 plus venetoclax significantly increases AML cell death.** MOLM-13 cells were treated with 5  $\mu$ M BML-210, 25 nM venetoclax or a combination thereof for 24 hours. The percentage of MOLM-13 cells that were viable (Annexin V and 7-AAD double negative), early apoptotic (Annexin V positive and 7-AAD negative), or late apoptotic (Annexin V and 7-AAD double positive) was determined by staining for Annexin V and 7-AAD and flow cytometry analysis. Dots represent individual experiments (n=4), bars represent mean  $\pm$  SD and were statistically analyzed by one-way analysis of variance (ANOVA) with Tukey's post-hoc test \*\*\*\*  $p \leq 0.0001$ . ns = not significant. - = uninduced, untreated cells. DMSO = solvent control, 0.1% DMSO as final concentration.
